# Supplementary material
Source: PubMed Central journal article supplement (PMC7460917)
Supplement: ASN.2019111163SupplementaryData.pdf [file ASN.2019111163SupplementaryData.pdf]

## Table of Contents for the Supplemental materials

|                       |                                                                    |
|-----------------------|--------------------------------------------------------------------|
| Supplemental Figure 1 | Generation and characterization of RGE-APChigh mice                |
| Supplemental Figure 2 | Protein C / aPC is glomerularly filtered                           |
| Supplemental Figure 3 | Characterizing knockdown of integrin- $\beta_3$ in podocytes       |
| Supplemental Figure 4 | aPC-induced signaling in podocytes                                 |
| Supplemental Figure 5 | Characteristics of experimental mice, corresponding to Figure 4A   |
| Supplemental Figure 6 | Characteristics of experimental mice, corresponding to Figure 4B-G |
| Supplemental Figure 7 | Characterization of experimental mice, corresponding to Figure 5   |
| Supplemental Figure 8 | Characterization of experimental mice, corresponding to Figure 6   |

## Supplementary Figure 1

**A**

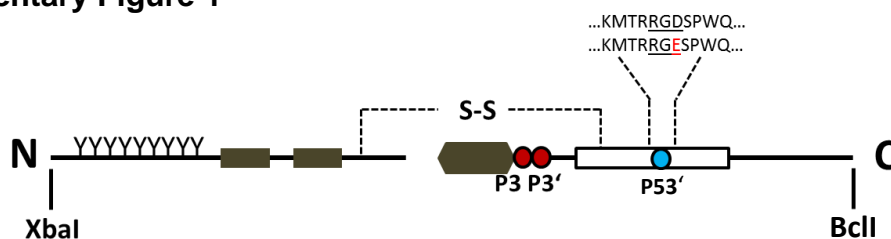

**B**

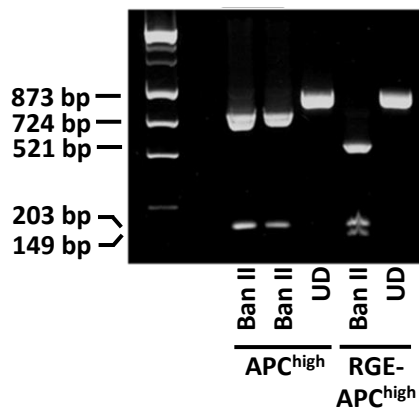

**C**

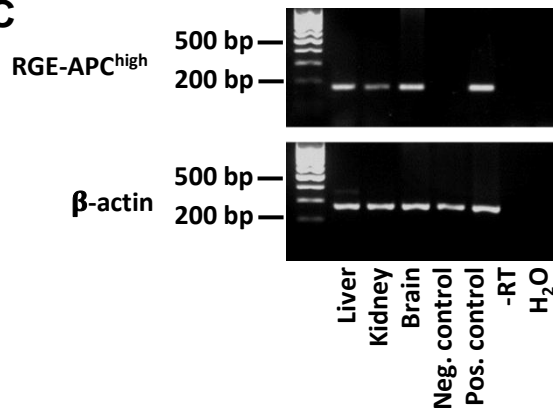

**D**

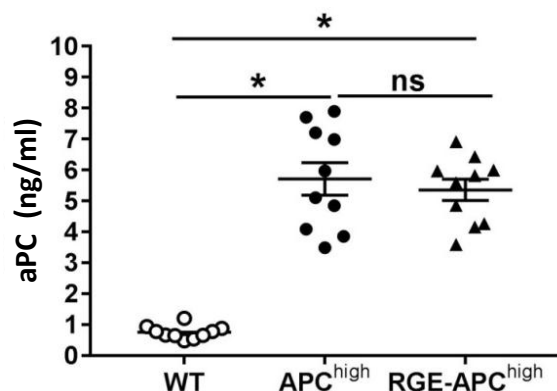

**E**

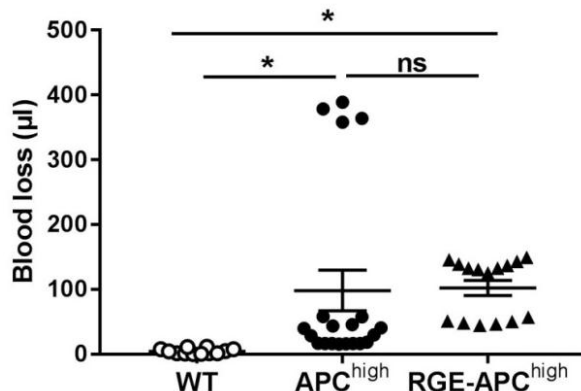

### Supplemental Figure 1 Generation and characterization of RGE-APC<sup>high</sup> mice

(A) Scheme of the RGE-APC<sup>high</sup> transgene. The sequence coding for the RGD sequence was mutated to code for a mutated protein containing RGE (P53': D222E). As a template, a plasmid coding the hyperactivatable human protein C (PC) mutant (P3: D167F; P3': D172K, aPC<sup>high</sup>) was used<sup>10</sup>. "Y" indicates Glu residues, gray rectangular boxes indicate EGF-like domains, the gray hexagon indicates the activation peptide, and the white rectangle indicates the serine protease module. S-S indicates a disulfide bond between the heavy and light chains of PC. The XbaI–BclI fragment was used for subcloning<sup>10</sup>.

(B) Representative gel images of undigested (UD) and BanII-digested (BanII) amplicons in aPC<sup>high</sup> and RGE-aPC<sup>high</sup> mice. The additional BanII restriction site in the RGE-aPC<sup>high</sup> transgene results in three (149 pb, 203 bp, and 521 bp) instead of two (149 bp and 724 bp, as seen in aPC<sup>high</sup> mice) fragments upon digestion of an 873 bp PCR amplicon.

(C) Representative gel images showing the mRNA expression of the RGE-aPC<sup>high</sup> transgene in different organs as detected by semiquantitative RT-PCR.

(D) Average plasma level of the mutant PC in transgenic aPC<sup>high</sup> and RGE-aPC<sup>high</sup> mice, as determined by activated protein C (aPC) capture assay.

(E) Blood loss in mice after a standardized tail cut. Blood loss is increased to a comparable extent both in aPC<sup>high</sup> and RGE-aPC<sup>high</sup> mice compared to wild-type mice.

The data shown in dot plots represent the mean ± standard error of the mean (SEM) of at least 10 mice per group; \**P*<0.05, ns: non significant; D, E: ANOVA with Tukey-adjusted post hoc comparison.

## Supplementary Figure 2

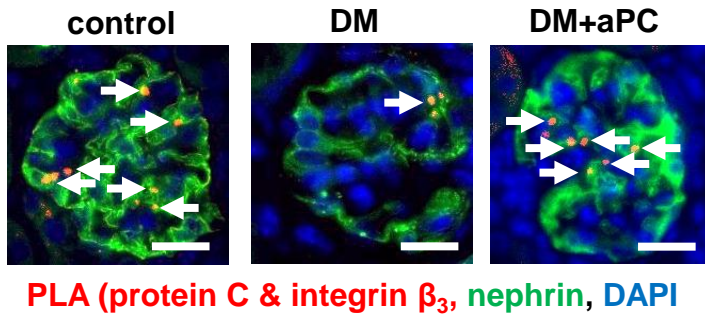

**Supplemental Figure 1 Protein C / aPC is glomerularly filtered.** Experimental evidence, that protein C / aPC is glomerularly filtered and interacts with  $\beta_3$  integrin on podocytes.

Representative images showing PC and integrin  $\beta_3$  interaction in glomeruli (detected by proximity ligation assay, PLA, red) in combination with immunofluorescent staining for nephrin (green) in non-diabetic (control, left), diabetic (DM, middle), and aPC-treated diabetic (DM+aPC, right) mice (age: 24 weeks); representative images, scale bar 20  $\mu\text{m}$ .

### Supplementary Figure 3

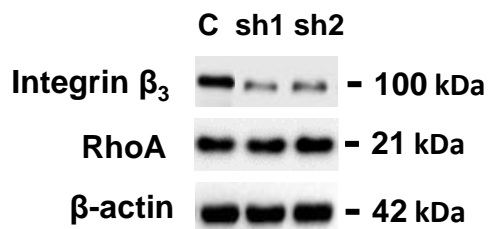

**Supplemental Figure 3** Characterizing knockdown of integrin- $\beta_3$  in podocytes. Representative immunoblot images showing efficient knockdown of integrin- $\beta_3$  (100 kDa) in human podocytes using two disjunct shRNA constructs (shRNA1 and shRNA2, labelled as sh1 and sh2) and a nonspecific shRNA-control (control, C). Expression of RhoA (21 kDa, middle) is not affected. Immunoblot of  $\beta$ -actin (42 kDa, bottom) is shown as loading control.

## Supplementary Figure 4

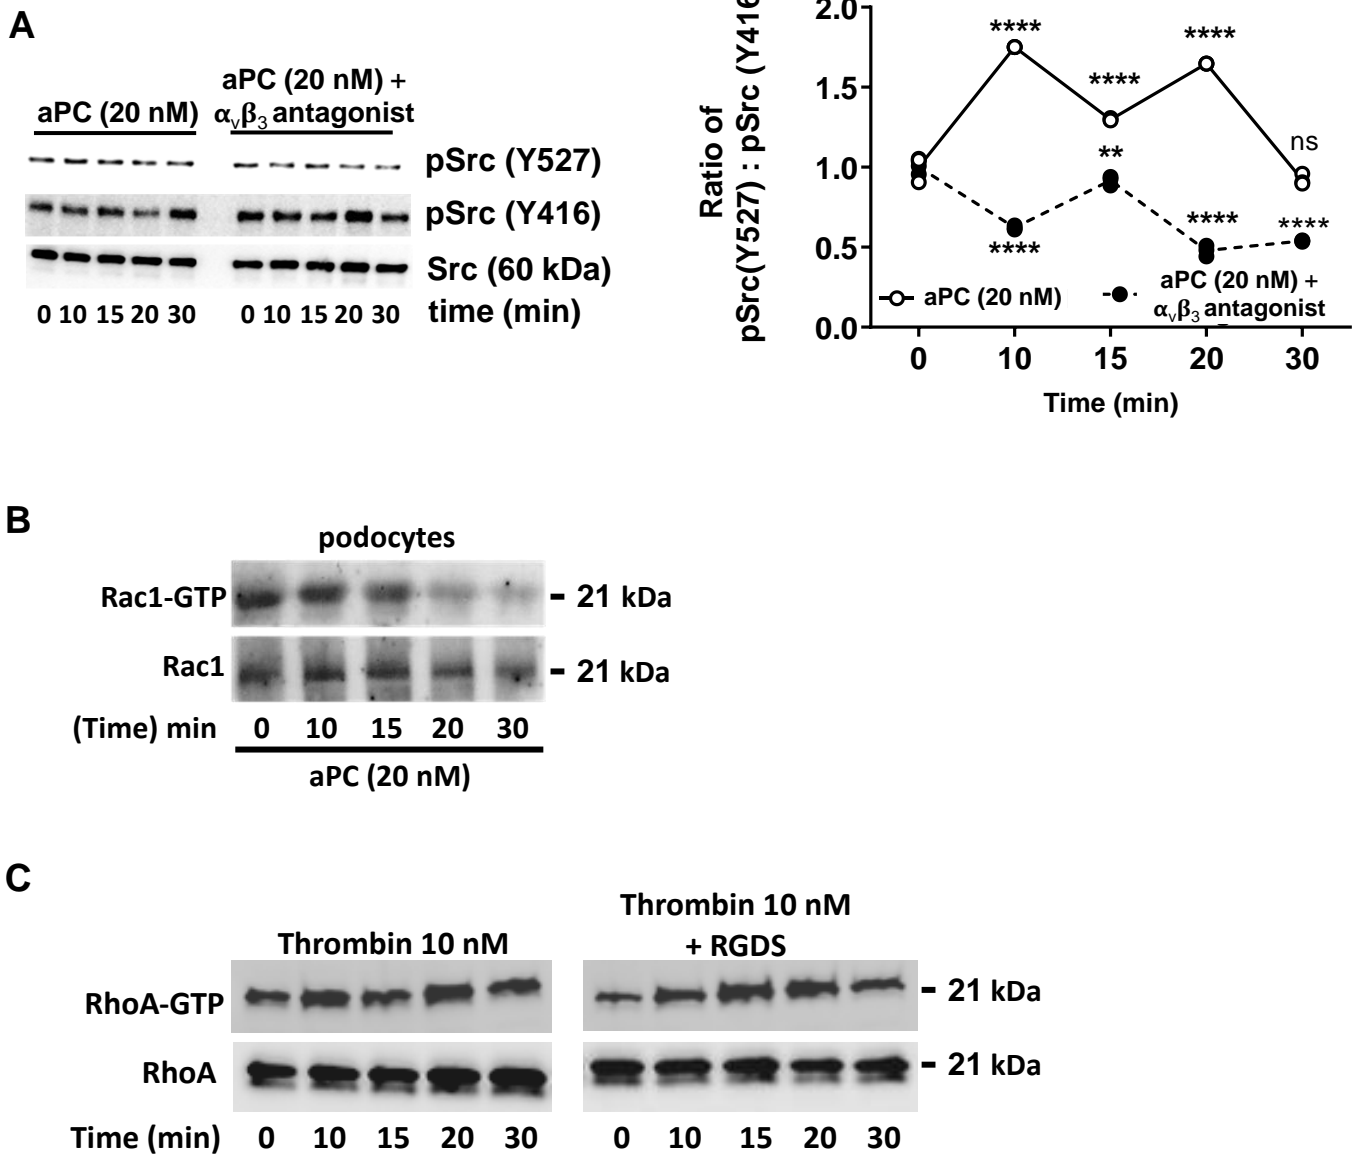

### Supplemental Figure 4 aPC-induced signaling in podocytes.

(A) Representative immunoblot images showing time-dependent phosphorylation of Src (Y527) and of Src (Y416) upon exposure of human podocytes to aPC alone or aPC plus CycloRGDfv ( $\alpha_v\beta_3$  antagonist, left) and dot-blot summarizing data from three independent repeat experiments (right, mean  $\pm$  SEM of 3); \*\* $P < 0.01$ , \*\*\*\* $P < 0.001$ ; ANOVA with Tukey-adjusted post hoc comparison of stimulated cells to base-line (0 min).

(B) Representative immunoblot images showing levels of Rac1-GTP and total Rac1 in podocytes at different timepoints before (0 min) or after stimulation with 20 nM aPC.

(C) Representative immunoblot images showing levels of RhoA-GTP and total RhoA in podocytes at different timepoints before (0 min) or after stimulation with 10 nM thrombin alone or 10 nM thrombin plus RGDS (50  $\mu$ g/ml).

## Supplementary Figure 5

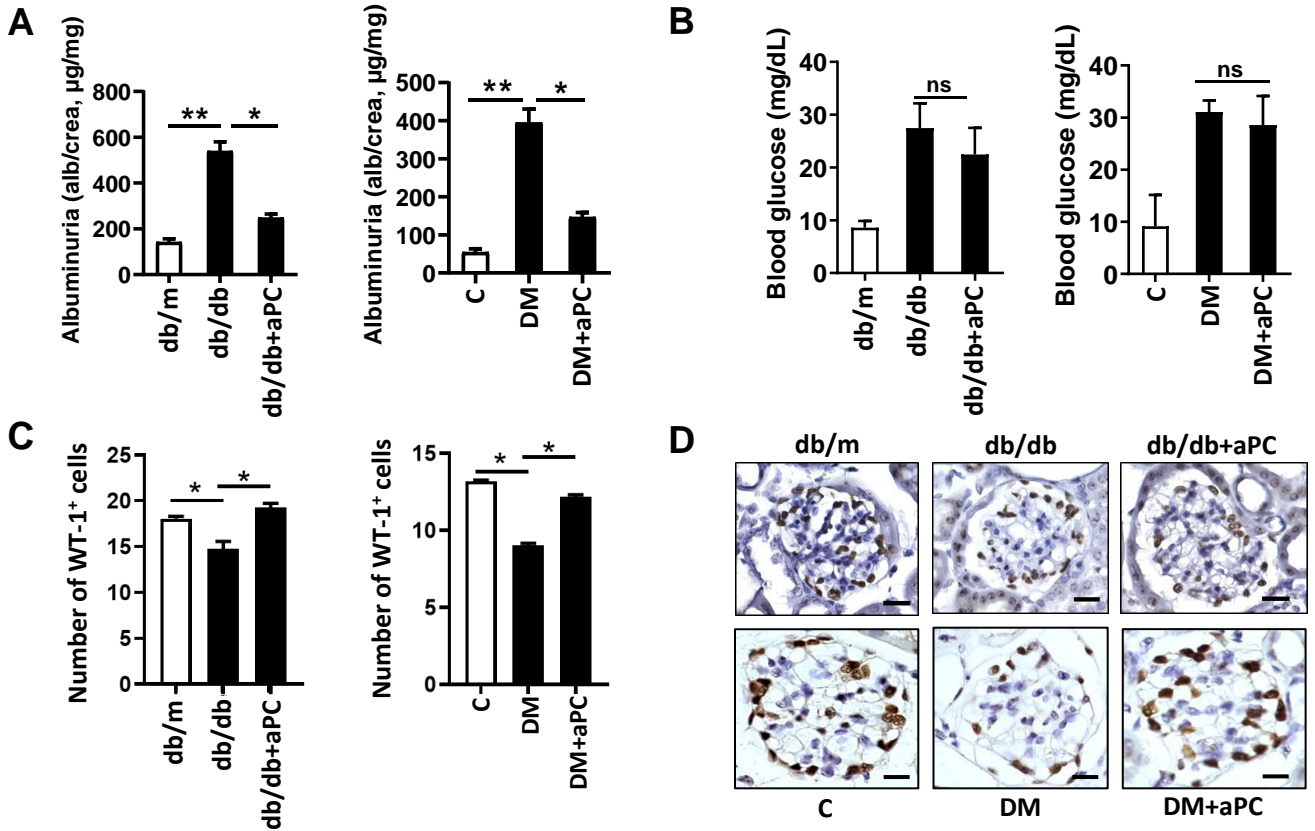

## Supplemental Figure 4 Characteristics of experimental mice, corresponding to Figure 4A

Bar graphs summarizing albuminuria (A), blood glucose levels (B), and WT-1 positive glomerular cells (C, exemplary images in D) in non-diabetic control (db/m, C) and diabetic mice without (db/db, DM) or with (db/db+aPC, DM+aPC) aPC treatment. D: Exemplary immunohistochemical images, WT-1 positive cells detected by HRP-DAB reaction, brown; hematoxylin nuclear counterstain, blue, size bar 10 µm.

The bar graphs show the mean ± standard error of the mean (SEM) of at least 5 mice per group; \*P<0.05, \*\*P<0.01, ns: non significant; ANOVA with Tukey-adjusted post hoc comparison; diabetic mice were compared do non-diabetic mice, and diabetic mice without were compared to diabetic mice with aPC treatment.

## Supplementary Figure 6

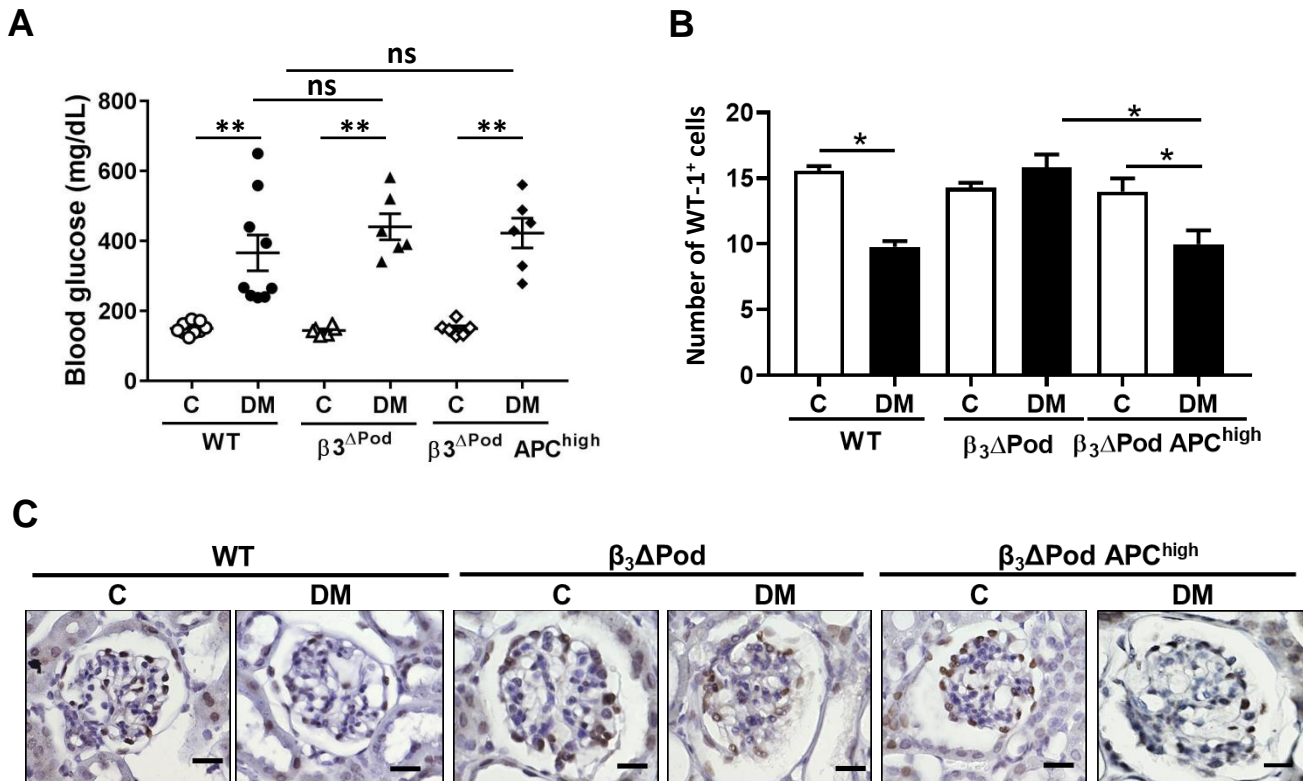

### Supplemental Figure 6 Characteristics of experimental mice, corresponding to Figure 4B-G

Dot plot summarizing blood glucose levels (A) and bar graph summarizing WT-1 positive glomerular cells (B, exemplary images in C) in wild-type,  $\beta_3^{\Delta Pod}$  and  $\beta_3^{\Delta Pod} APC^{high}$  mice without (control, C) or with (DM) persistent hyperglycemia. C: Exemplary immunohistochemical images, WT-1 positive cells detected by HRP-DAB reaction, brown; hematoxylin nuclear counterstain, blue, size bar 10  $\mu m$ .

The dot plots and bar graphs show the mean  $\pm$  standard error of the mean (SEM) of at least 5 mice per group; \*\* $P < 0.01$ , \*\*\* $P < 0.001$ , ns: non significant; ANOVA with Tukey-adjusted post hoc comparison; for each genotype diabetic mice were compared do non-diabetic mice, and diabetic mutant mice were compared to diabetic wild-type mice.

## Supplementary Figure 7

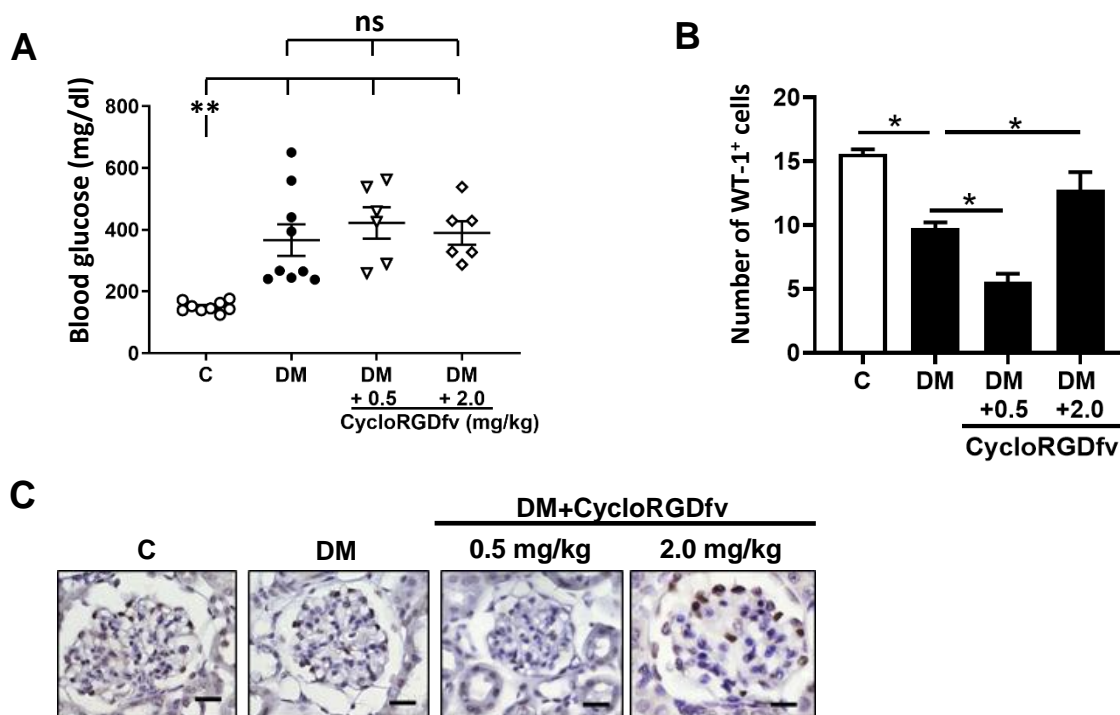

### Supplemental Figure 7 Characterization of experimental mice, corresponding to Figure 5

Blood glucose levels (A) and WT-1 positive glomerular cells (B,C) in wild-type mice without (control, C) or diabetic mice injected either with PBS (diabetic control, DM) or with the integrin- $\alpha_v\beta_3$  antagonist CycloRGDfv at a low (0.5 mg/kg, DM+0.5) or high (2 mg/kg, DM+2.0) dose. Blood glucose levels do not significantly differ among the diabetic groups (A, dot plot summarizing the results). Compared to control diabetic mice, the frequency of WT-1 positive cells is reduced in diabetic wild-type mice treated with low dose CycloRGDfv, but increased in diabetic wild-type mice treated with high dose CycloRGDfv (B: dot blot summarizing results; C: exemplary images; WT-1: HRP-DAB reaction, brown; hematoxylin nuclear counterstain).

The dot plots and bar graphs show the mean  $\pm$  standard error of the mean (SEM) of at least 5 mice per group; \* $P < 0.05$ , \*\* $P < 0.01$ , ns: non significant; ANOVA with Tukey-adjusted post hoc comparison; A: diabetic mice were compared do non-diabetic mice, and diabetic mice treated with CycloRGDfv were compared to diabetic control mice; B: diabetic mice without CycloRGDfv were compared to non-diabetic mice, and diabetic mice treated with Cyclo-RGDfv were compared to diabetic control mice.



## Supplementary Figure 8

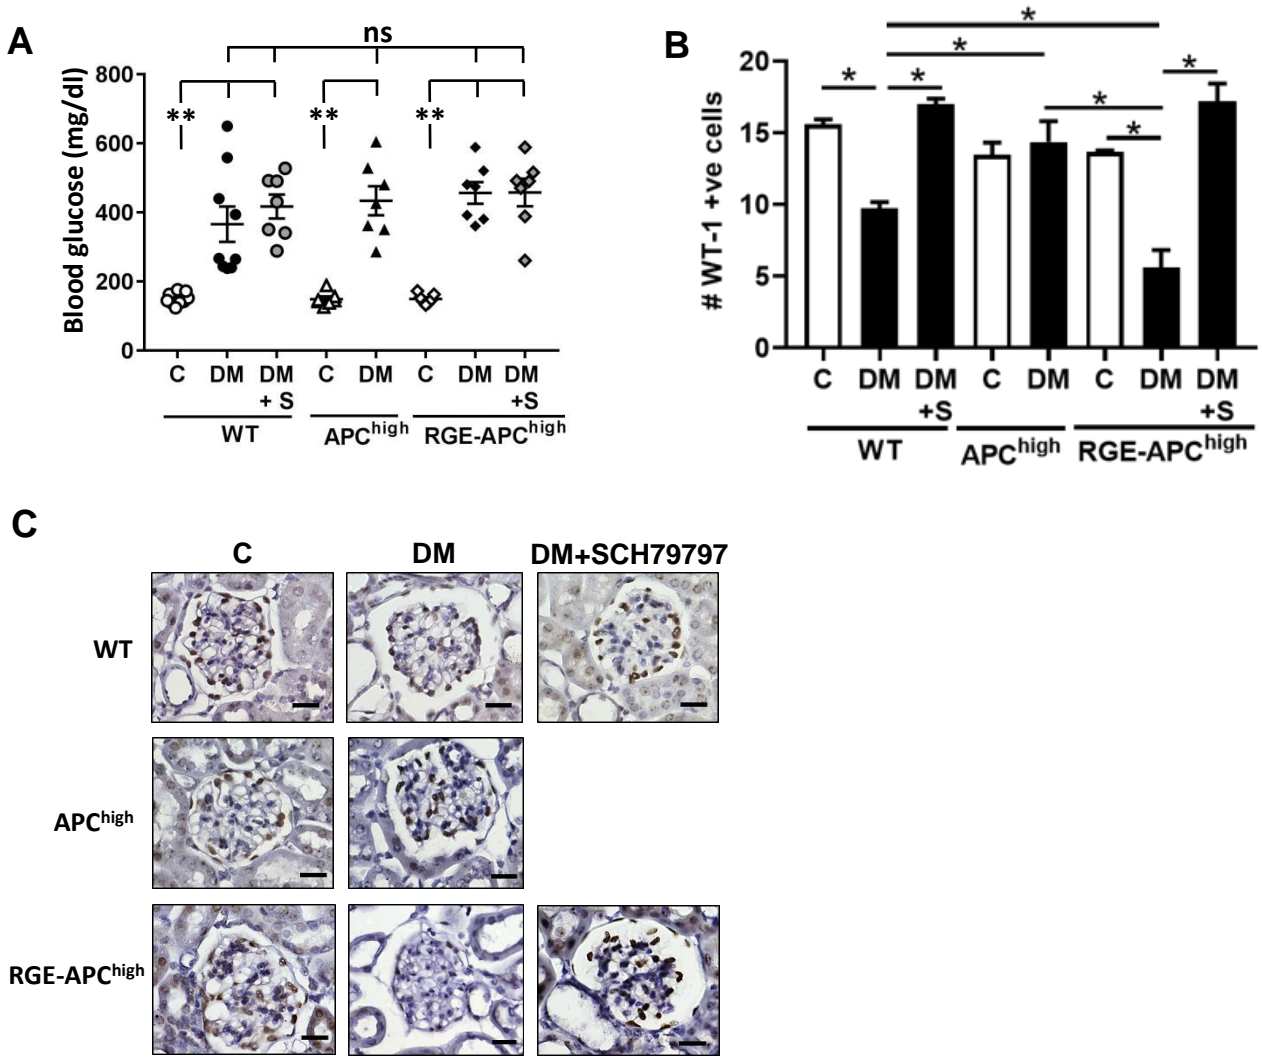

### Supplemental Figure 8. Characterization of experimental mice, corresponding to Figure 6

Dot plot summarizing the blood glucose levels (A) and bar graph summarizing WT-1 positive glomerular cells (B) in wild-type,  $APC^{high}$ , and RGE- $APC^{high}$  mice without (C) or with (DM) persistent hyperglycemia. Subgroups of diabetic mice were injected with the protease-activated receptor 1 (PAR1) antagonist SHC79797 (DM+S). Blood glucose levels do not significantly differ among the diabetic groups. The frequency of WT-1 positive cells is reduced in diabetic wild-type mice and to a larger extent in RGE- $APC^{high}$  mice. SHC79797 intervention protects from podocyte loss in diabetic mice; C: exemplary images; WT-1: HRP-DAB reaction, brown; hematoxylin nuclear counterstain.

The dot plots and bar graphs show the mean  $\pm$  standard error of the mean (SEM) of at least 5 mice per group; \* $P < 0.05$ , \*\* $P < 0.01$ ; ANOVA with Tukey-adjusted post hoc comparison; for each genotype diabetic mice were compared do non-diabetic mice, diabetic mutant mice were compared to diabetic wild-type mice (without SHC79797 treatment), and diabetic mice treated with SCH79797 were compared to untreated diabetic mice of the same genotype.
